# Supplementary material
Source: ML conference proceedings conference paper supplement (https://proceedings.mlr.press/v32/gregor14.html)
Supplement: Supplementary file 1 [file gregor14-supp.pdf]

---

## Supplement: Deep AutoRegressive Networks

---

### 1. Data generation from fDARN

In the Figure 1 we show data generated from fast DARN.

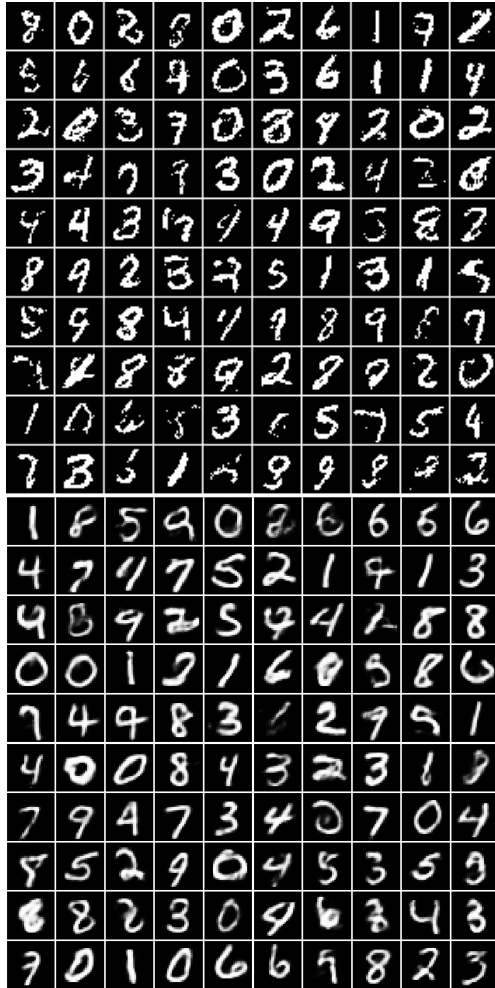

Figure 1. **Top:** Samples generated from fDARN. **Bottom:** Generated probabilities from fDARN with fDARN trained on original real valued data. There were 400 hidden units with about 5% level of sparsity.
